# Supplementary material for: Diagnostic error increases mortality and length of hospital stay in patients presenting through the emergency room
Source: PubMed Central journal article supplement (PMC6505221; doi:10.1186/s13049-019-0629-z), 2019-05-08
Supplement: 13049_2019_629_MOESM1_ESM.pdf [file 13049_2019_629_MOESM1_ESM.pdf]

## 1 Persönliche Daten

1.1 AKRONYM ARZT (die ersten beiden Buchstaben vom Vornamen der Mutter, die ersten beiden Buchstaben vom Vornamen des Vaters, Tag der eigenen Geburt. Zum Beispiel LIPE05 für Lisa und Peter, eigener Geburtstag am 5. Februar)

1.2 NAME und GEBURTSDATUM des Patienten

## 2 Die folgenden Fragen beziehen sich auf DIESEN Patienten:

2.1 Wie SICHER sind Sie sich, dass die von Ihnen gestellte Diagnose zutrifft?

unsicher (50%)      sicher(100%)

2.2 Wie SCHWIERIG war für Sie die Diagnosestellung?

schwierig      einfach

2.3 Wie VERTRAUT sind Sie mit dem diagnostizierten Krankheitsbild?

nie gesehen      vertraut

2.4 Wie gross war Ihre ZEITLICHE BEANSPRUCHUNG (durch alle Ihre Patienten) zum Zeitpunkt der Diagnosestellung?

limitierend      gering

2.5 Wie stufen Sie Ihre MÜDIGKEIT zum Zeitpunkt der Diagnosestellung ein?

sehr müde      hell wach

2.6 Wie gut konnten Sie sich sprachlich mit dem Patienten VERSTÄNDIGEN?

fliegend  operational  eingeschränkt  bruchstückhaft  über Dritte  gar nicht

2.7 Wie TYPISCH präsentiert sich der Patient im Bezug auf das Krankheitsbild?

atypisch  typisch

2.8 Wie erlebten Sie die ZUSAMMENARBEIT im ärztlichen Team während des diagnostischen Prozesses?

war allein      sehr gut

2.9 Wie HÄUFIG arbeiten Sie mit den beteiligten ärztlichen Kollegen des UNZ zusammen?

sehr selten      sehr oft

Danke für Ihre Mitarbeit! Fragen oder Anregungen gern an [wolf.hautz@insel.ch](mailto:wolf.hautz@insel.ch), Sucher 7879.

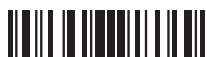

63468

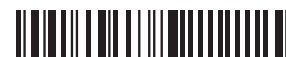

1533544182 0001
