# Supplementary material for: Diagnostic error increases mortality and length of hospital stay in patients presenting through the emergency room
Source: PubMed Central journal article supplement (PMC6505221; doi:10.1186/s13049-019-0629-z), 2019-05-08
Supplement: 13049_2019_629_MOESM2_ESM.pdf [file 13049_2019_629_MOESM2_ESM.pdf]

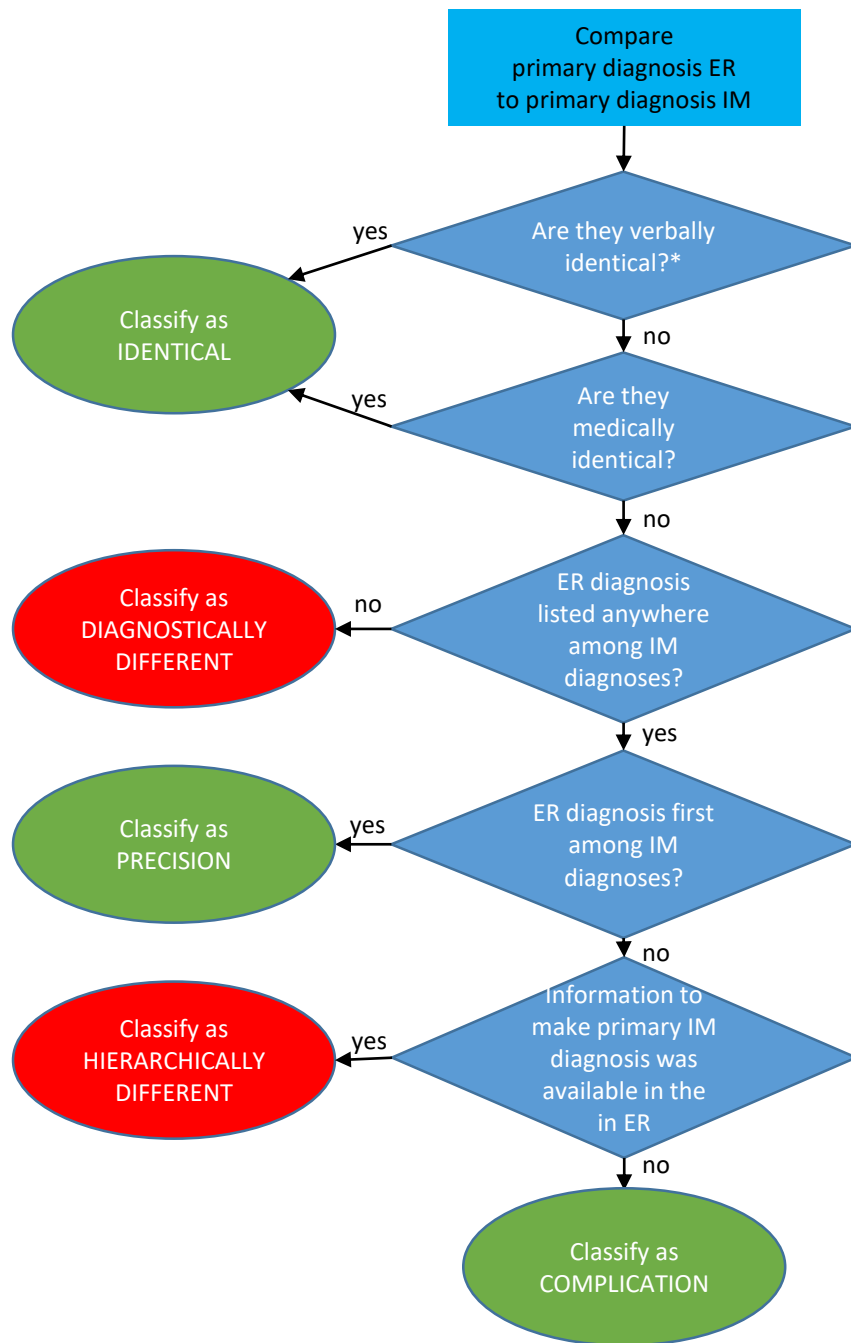

\*Take «suspicion off X», «death because of X» and non-medical specifications of X as X
